# Supplementary material for: Wind-induced vibration control for tower cranes based on a rear-mounted, mass-sharing bi-directional tuned mass damper
Source: Copernicus journal article supplement (doi:10.5194/ms-16-907-2025), 2025-11-26
Supplement: Supplementary file 1 [file RMS result.xlsx]

## Sheet: Sheet1
rear-mounted												mid-mounted
	a6a				d6a								a6a				d6a
massRatio	point1	point2	point3	point4	point1	point2	point3	point4				massRatio	point1	point2	point3	point4	point1	point2	point3	point4
0.01	0.285956	0.246454	0.281655	0.281734	0.114841	0.0997303	0.112556	0.112755				0.01	0.209167	0.25101	0.206664	0.203478	0.111231	0.116365	0.107851	0.10636
0.02	0.321698	0.276834	0.317218	0.317797	0.13191	0.114505	0.129595	0.130603				0.03	0.268738	0.301813	0.266067	0.263183	0.125617	0.128499	0.122452	0.121261
0.03	0.297765	0.258816	0.293245	0.293678	0.129843	0.112491	0.127254	0.128764				0.05	0.244493	0.280064	0.241951	0.238782	0.114796	0.119165	0.111487	0.110154
0.04	0.262966	0.231491	0.258363	0.258823	0.122531	0.105893	0.119582	0.121555					a6c				d6c
0.05	0.278945	0.246074	0.274148	0.275141	0.130077	0.112191	0.126986	0.129633				massRatio	point1	point2	point3	point4	point1	point2	point3	point4
	a6c				d6c							0.01	0.307568	0.313534	0.16962	0.0485374	0.118614	0.120403	0.059425	-0.00462866
massRatio	point1	point2	point3	point4	point1	point2	point3	point4				0.03	0.312489	0.319137	0.184403	0.0424078	0.111079	0.113796	0.0666795	-0.00726373
0.01	0.17116	0.192505	0.300316	0.147529	0.0513105	0.0510033	0.0662399	0.0713176				0.05	0.350887	0.354872	0.210872	0.0378473	0.126093	0.129877	0.0850119	-0.00933713
0.02	0.239878	0.258453	0.355459	0.17174	0.105672	0.105405	0.133839	0.0980214					a9a				d9a
0.03	0.266151	0.284283	0.384395	0.154952	0.129268	0.129199	0.167534	0.0974554				massRatio	point1	point2	point3	point4	point1	point2	point3	point4
0.04	0.270975	0.289647	0.403006	0.122708	0.134922	0.134911	0.180501	0.083703				0.01	0.37103	0.387148	0.368489	0.366629	0.14991	0.129961	0.148431	0.148465
0.05	0.27428	0.293397	0.424518	0.0985563	0.138098	0.137915	0.1898	0.0743211				0.03	0.431761	0.439784	0.429114	0.427658	0.168256	0.145614	0.167049	0.167435
	a9a				d9a							0.05	0.472244	0.474204	0.469511	0.468429	0.17747	0.153417	0.176403	0.177
massRatio	point1	point2	point3	point4	point1	point2	point3	point4
0.01	0.3476	0.2957	0.3433	0.3437	0.1468	0.1271	0.1451	0.1456
0.02	0.3732	0.3183	0.3684	0.3691	0.1603	0.1384	0.1585	0.1597
0.03	0.399	0.3408	0.394	0.3952	0.1697	0.1463	0.1678	0.1697
0.04	0.4255	0.364	0.4202	0.4221	0.1784	0.1537	0.1764	0.179
0.05	0.4382	0.3768	0.4327	0.4349	0.184	0.1586	0.1818	0.185
