# Supplementary material for: Wind-induced vibration control for tower cranes based on a rear-mounted, mass-sharing bi-directional tuned mass damper
Source: Copernicus journal article supplement (doi:10.5194/ms-16-907-2025), 2025-11-26
Supplement: Supplementary file [file ms-16-907-2025-supplement-title-page.pdf › ms-16-907-2025-supplement-title-page.pdf]

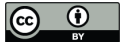

## *Supplement of*

# **Wind-induced vibration control for tower cranes based on a rear-mounted, mass-sharing bi-directional tuned mass damper**

**Lingyun Yang et al.**

*Correspondence to:* Run Du ([rdu@swjtu.edu.cn](mailto:rdu@swjtu.edu.cn))

- ms-16-907-2025-supplement-title-page.pdf
- RMS data
  - MATLAB figure (RMS result)
    - \* mid-mounted
    - \* readme.txt
    - \* rear-mounted
  - RMS result.xlsx

The copyright of individual parts of the supplement might differ from the article licence.
